# Supplementary material
Source: publisher figshare collection journal article supplement (https://karger.figshare.com/articles/dataset/_/23211707)
Supplement: Supplementary file 1 [file 1]

a

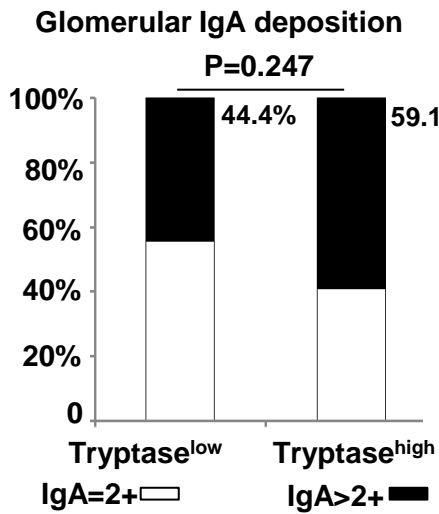

b

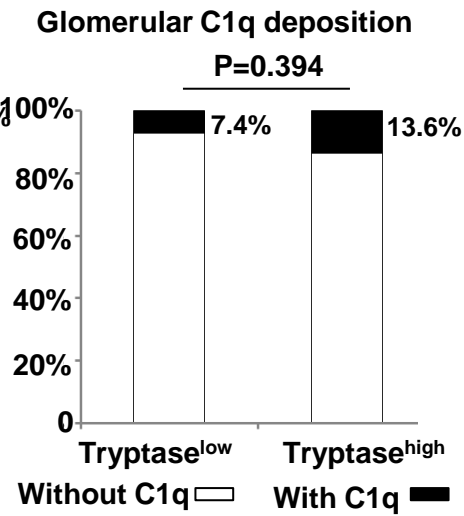

c

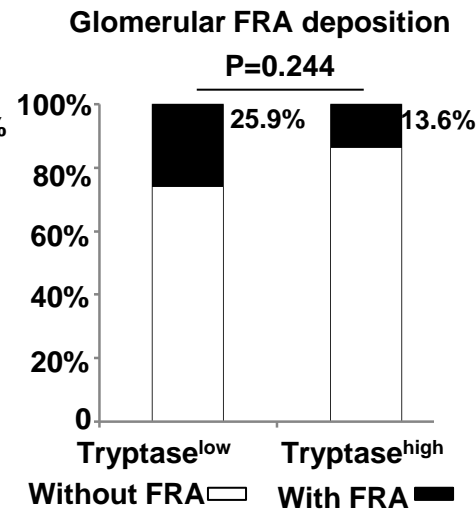

**Supplementary figure 1. Glomerular deposition of the biopsies by immunofluorescence in Tryptase<sup>low</sup> and Tryptase<sup>high</sup> groups.** (a-c) Glomerular IgA, C1q and FRA deposition were graded by absent (score, 0), mild (score, 1), severe (score, 2), respectively. The difference of constituent ratio were analyzed by Chi square test. The difference of glomerular IgA, C1q and FRA deposition in the two groups was not statistically significant.
